# Supplementary material for: Obesogenic Gut Microbiota as a Crucial Factor Defining the Depletion of Enzyme Representation for Vitamin B12 Synthesis in the Mouse Intestine
Source: Preprints.org preprint supplement (doi:10.20944/preprints202404.0075.v1), 2024-04-02
Supplement: Supplementary file 2 [file supplementary]

Supplementary Table 1. Primers used to amplify the V3-V4 region of bacterial 16S rRNA gene.

| Forward Primer: | **TCGTCGGCAGCGTCAGATGTGTATAAGAGACAG**CCTACGGGAGGCAGCAG |
| --- | --- |
| Reverse Primer: | **GTCTCGTGGGCTCGGAGATGTGTATAAGAGACAG**GACTACAAGGGTATCTAATCC |
